# Supplementary material for: Availability and readiness of routine perinatal and emergency obstetric and newborn care services in health facilities in Burkina Faso: trend analysis from 2014 to 2020
Source: Research Square preprint supplement (doi:10.21203/rs.3.rs-7463045/v1), 2025-10-08
Supplement: Supplementary file 1 [file 93d3768d074a7c92bda53566.docx]

**Additional file 1: Inclusion of tracer elements from SARA and HHFA**

- In HHFA, in addition to the 16 EmONC signal functions, there is the “rooming in for mother and newborn” function. We did not consider this as it was not collected in SARA [**Table S1**].
- For readiness, there are also three indicators that we did not consider, as they were not collected in SARA. These are clean towel for drying newborn, guideline for essential newborn care, and rooming in for mother and newborn [**Table S1**].

**Table S1**. Tracer indicators for basic and comprehensive EmONC service availability and readiness

| **Service** | **Domains** | **Number** | **Tracer element** | | | | **SARA** | **HHFA** | **Included** |
| --- | --- | --- | --- | --- | --- | --- | --- | --- | --- |
| Basic EmONC | **Availability** | | |  |  |  | | | | |
| Obstetric signal functions | 01 | Parenteral administration of antibiotics | | | | ü | ü | ü |
| 02 | Parenteral administration of oxytocic drug | | | | ü | ü | ü |
| 03 | Parenteral administration of anticonvulsants | | | | ü | ü | ü |
| 04 | Assisted vaginal delivery | | | | ü | ü | ü |
| 05 | Manual removal of placenta | | | | ü | ü | ü |
| 06 | Manual removal of retained products | | | | ü | ü | ü |
| Newborn signal function | 07 | Neonatal resuscitation | | | | ü | ü | ü |
| 08 | Antibiotics for preterm or prolonged premature rupture of membranes to prevent infection | | | | ü | ü | ü |
| 09 | Corticosteroids in preterm labour | | | | ü | ü | ü |
| 10 | Kangaroo mother care for premature/very small babies* | | | | ü | ü | x |
| 11 | Injectable antibiotics for neonatal sepsis | | | | ü | ü | ü |
| Routine perinatal services | 12 | Administration of oxytocin for the prevention of postpartum haemorrhage | | | | ü | ü | ü |
| 13 | Monitoring and management of labour using partograph | | | | ü | ü | ü |
| 14 | Immediate and exclusive breastfeeding | | | | ü | ü | ü |
| 15 | Hygienic cord care | | | | ü | ü | ü |
| 16 | Drying and wrapping the newborn and immediate skin to skin contact | | | | ü | ü | ü |
| 17 | Rooming in for mother and newborn | | | |  | ü | x |
| **Readiness** | | |  |  |  | | | | |
| Staff and guidelines | 01 | Guidelines for essential childbirth care | | | | ü | ü | ü |
| 02 | Guidelines for essential newborn care | | | | x | ü | x |
| 03 | Checklists and/or job-aids for essential childbirth care | | | | ü | ü | ü |
| 04 | Staff trained in essential childbirth care | | | | ü | ü | ü |
| 05 | Staff trained in newborn resuscitation | | | | ü | ü | ü |
| Equipment | 06 | Emergency transport | | | | ü | ü | ü |
| 07 | Sterilisation equipment | | | | ü | ü | ü |
| 08 | Examination light | | | | ü | ü | ü |
| 09 | Delivery pack | | | | ü | ü | ü |
| 10 | Suction apparatus (mucus extractor) | | | | ü | ü | ü |
| 11 | Manual vacuum extractor | | | | ü | ü | ü |
| 12 | Vacuum aspirator or Dilatation and Curettage kit | | | | ü | ü | ü |
| 13 | Adult bag and mask | | | | ü | ü | ü |
| 14 | Neonatal bag and mask | | | | ü | ü | ü |
| 15 | Delivery bed | | | | ü | ü | ü |
| 16 | Partograph | | | | ü | ü | ü |
| 17 | Gloves | | | | ü | ü | ü |
| 18 | Infant weighing scale | | | | ü | ü | ü |
| 19 | Blood pressure apparatus | | | | ü | ü | ü |
| 20 | Thermometer | | | | ü | ü | ü |
| 21 | Hand hygiene items | | | | ü | ü | ü |
|  | 22 | Clean towel for drying newborn | | | | x | ü | x |
| Medicines and supplies | 23 | Antibiotic eye ointment for newborn | | | | ü | ü | ü |
| 24 | Injectable uterotonic (Oxytocin) | | | | ü | ü | ü |
| 25 | Injectable antibiotic (Broad-spectrum: usually Gentamicin, Penicillin, or Ampicillin) | | | | ü | ü | ü |
| 26 | Magnesium sulphate | | | | ü | ü | ü |
| 27 | Skin disinfectant | | | | ü | ü | ü |
| 28 | Intravenous solution with infusion set (Normal saline, Ringers Lactate, and Dextrose 5%) | | | | ü | ü | ü |
| 29 | Betamethasone or dexamethasone injectable | | | | ü | ü | ü |
| Comprehensive EmONC | **Availability** |  |  | | | |  |  |  |
| Obstetric signal functions | 01 | Caesarean section | | | | ü | ü | ü |
| 02 | Blood transfusion | | | | ü | ü | ü |
| **Readiness** |  |  | | | |  |  |  |
| Staff and guidelines | 01 | Guidelines for comprehensive EmONC | | | | ü | ü | ü |
|  | 02 | Staff trained in comprehensive EmONC | | | | ü | ü | ü |
|  | 03 | Staff trained in surgery | | | | ü | ü | ü |
|  | 04 | Staff trained in anaesthesia | | | | ü | ü | ü |
| Equipment | 05 | Anaesthesia equipment | | | | ü | ü | ü |
|  | 06 | Resuscitation table | | | | ü | ü | ü |
|  | 07 | Incubator | | | | ü | ü | ü |
|  | 08 | Oxygen | | | | ü | ü | ü |
|  | 09 | Spinal needle | | | | ü | ü | ü |
| Diagnostics | 10 | Blood typing | | | | ü | ü | ü |
|  | 11 | Cross match testing | | | | ü | ü | ü |
| Medicines and supplies | 12 | Blood supply sufficiency | | | | ü | ü | ü |
| 13 | Blood supply safety | | | | ü | ü | ü |
| 14 | Lidocaine 5% | | | | ü | ü | ü |
| 15 | Epinephrine (injectable) | | | | ü | ü | ü |
| 16 | Halothane (inhalation) | | | | ü | ü | ü |
| 17 | Atropine (injectable) | | | | ü | ü | ü |
| 18 | Thiopental (powder) | | | | ü | ü | ü |
| 19 | Suxamethonium bromide (powder) | | | | ü | ü | ü |
| 20 | Ketamine (injectable) | | | | ü | ü | ü |

*Excluded because of dissimilar question across both surveys.
