# Supplementary material for: Availability and readiness of routine perinatal and emergency obstetric and newborn care services in health facilities in Burkina Faso: trend analysis from 2014 to 2020
Source: Research Square preprint supplement (doi:10.21203/rs.3.rs-7463045/v1), 2025-10-08
Supplement: Supplementary file 2 [file ac3d4e988be154755deeaed0.docx]

**Additional File 2: Availability of tracer indicators and readiness scores for routine perinatal and basic EmONC services**

Reviewing specific tracer indicators for each domain, three of the four indicators for staff and guidelines showed a significant downward trend, including guidelines for essential childbirth care (, checklists/job-aids for essential childbirth care (, and staff trained in essential childbirth care (. For equipment, there was a statistically significant downward trend in 10 of 17 indicators including emergency transport (, sterilization equipment (, examination light (, vacuum aspirator/dilatation and curettage kit (, delivery bed with stirrups (, partograph (, gloves (, blood pressure machine (, thermometer ( and hand hygiene items ( [**Table S2**].

**Table S2**. Availability of tracer indicators and readiness score for routine perinatal and basic EmONC services

| **Basic EmONC services and readiness items** | **2014** | **2016** | **2018** | **2020** | ***slope*** | ***p*** |
| --- | --- | --- | --- | --- | --- | --- |
| Service readiness |  |  |  |  |  |  |
| Staff and guidelines |  |  |  |  |  |  |
| Guidelines for essential childbirth care | 84.5 | 53.0 | 34.3 | 56.3 | -0.049 | <0.001 |
| Checklists and/or job-aids for essential childbirth care | 98.6 | 97.4 | 96.5 | 69.1 | -0.046 | <0.001 |
| Staff trained in essential childbirth care | 62.2 | 53.1 | 41.8 | 39.6 | -0.039 | <0.001 |
| Staff trained in newborn resuscitation | 42.9 | 46.0 | 42.4 | 42.8 | -0.002 | 0.395 |
| Equipment |  |  |  |  |  |  |
| Emergency transport | 95.7 | 92.3 | 88.1 | 68.7 | -0.044 | <0.001 |
| Sterilisation equipment | 78.1 | 80.8 | 78.3 | 69.6 | -0.015 | <0.001 |
| Examination light | 60.6 | 58.2 | 53.1 | 40.3 | -0.033 | <0.001 |
| Delivery pack | 98.8 | 70.6 | 98.0 | 94.6 | 0.009 | <0.001 |
| Suction apparatus (mucus extractor) | 29.8 | 35.5 | 41.7 | 91.1 | 0.097 | <0.001 |
| Manual vacuum extractor | 8.6 | 6.6 | 19.7 | 61.6 | 0.088 | <0.001 |
| Vacuum aspirator or Dilatation and Curettage kit | 27.2 | 23.7 | 35.5 | 20.1 | -0.005 | <0.001 |
| Adult bag and mask | 6.4 | 6.7 | 17.6 | 11.4 | 0.013 | <0.001 |
| Neonatal bag and mask (size 0 and 1) | 6.4 | 18.3 | 26.8 | 13.5 | 0.013 | <0.001 |
| Delivery bed or Delivery bed with stirrups | 96.8 | 96.7 | 95.2 | 56.2* | -0.064 | <0.001 |
| Partograph | 97.3 | 95.4 | 91.1 | 82.5 | -0.025 | <0.001 |
| Gloves | 99.6 | 99.2 | 98.5 | 97.4 | -0.004 | <0.001 |
| Infant weighing scale | 82.9 | 77.7 | 74 | 91.9 | 0.013 | <0.001 |
| Blood pressure apparatus | 97.5 | 98 | 97.2 | 90.7 | -0.011 | <0.001 |
| Thermometer | 99.8 | 99.3 | 98.4 | 95.4 | -0.007 | <0.001 |
| Hand hygiene items | 96.8 | 93.8 | 95.7 | 94.4 | -0.003 | 0.017 |
| Medicines and products |  |  |  |  |  |  |
| Antibiotic eye ointment for newborn | 35.9 | 25 | 23.3 | 21.1 | -0.023 | <0.001 |
| Injectable uterotonic (Oxytocin) | 66.3 | 60.8 | 50.9 | 86.6 | 0.028 | <0.001 |
| Injectable antibiotic (Broad-spectrum) | 94.3 | 94 | 88.6 | 87.8 | -0.013 | <0.001 |
| Magnesium sulphate | 25.9 | 37.6 | 49.6 | 54.3 | 0.048 | <0.001 |
| Skin disinfectant | 59.4 | 54 | 51 | 81.4 | 0.033 | <0.001 |
| Intravenous solution with infusion set | 89.6 | 86.9 | 81.1 | 94.1 | 0.005 | 0.006 |
| Betamethasone or dexamethasone injectable | 16.2 | 14.5 | 26.7 | 22.5 | 0.016 | <0.001 |

* Delivery bed with stirrups was specified in HHFA only.

**Availability of tracer indicators and readiness scores for comprehensive EmONC services**

Reviewing specific tracer indicators for each domain, one of the three indicators for staff and guidelines showed a significant downward trend - staff trained in comprehensive EmONC (. For equipment, there was a statistically significant downward trend for two of five indicators including anesthesia equipment ( and oxygen (. Both indicators for diagnosis (blood typing ( and cross match testing (. ) and five of nine indicators for medicine and product including blood supply safety (, halothane (, thiopental powder (, Suxamethonium bromide powder (, and Ketamine injection (. showed significant downward trends [**Table S3**].

**Table S3**. availability and readiness of comprehensive EmONC functions

| **Domains** | **Number** | **Tracer element** | **2014** | **2016** | **2018** | **2020** | **Adjusted trend** | ***p* for trend** |
| --- | --- | --- | --- | --- | --- | --- | --- | --- |
| **Availability** | | |  |  |  |  |  |  |
| Obstetric signal functions | 01 | Caesarean section | 84.1 | 83.5 | 79.7 | 83.2 | 0.004 | 0.569 |
| 02 | Blood transfusion | 89.0 | 83.8 | 77.4 | 82.3 | -0.004 | 0.602 |
| **Readiness** | | |  |  |  |  |  |  |
| Staff and guidelines | 01 | Guidelines for comprehensive EmONC | 62.2 | 30.6 | 24.3 | 42.5 | -0.020 | 0.063 |
| 02 | Staff trained in comprehensive EmONC | 78.0 | 50.4 | 37.9 | 47.8 | -0.043 | 0.001 |
| 03 | Staff trained in surgery | 82.9 | 82.3 | 75.3 | 77.0 | -0.004 | 0.665 |
| 04 | Staff trained in anaesthesia | 79.3 | 82.3 | 73.0 | 70.8 | -0.012 | 0.182 |
| Equipment | 05 | Anaesthesia equipment | 8.5 | 7.4 | 15.5 | 0.0 | -0.013 | 0.027 |
| 06 | Resuscitation table | 61.0 | 43.7 | 63.5 | 56.6 | -0.010 | 0.398 |
| 07 | Incubator | 19.5 | 12.3 | 22.0 | 18.6 | 0.002 | 0.862 |
| 08 | Oxygen | 47.6 | 40.3 | 48.9 | 25.7 | -0.036 | 0.002 |
| 09 | Spinal needle | 85.4 | 75.3 | 67.9 | 74.3 | -0.011 | 0.226 |
| Diagnostics | 10 | Blood typing | 80.5 | 87.1 | 74.5 | 67.3 | -0.023 | 0.010 |
|  | 11 | Cross match testing | 45.1 | 45.5 | 38.9 | 27.4 | -0.029 | 0.007 |
| Medicines and supplies | 12 | Blood supply sufficiency | 26.8 | 21.6 | 22.8 | 18.6 | -0.012 | 0.232 |
| 13 | Blood supply safety | 79.3 | 79.7 | 60.2 | 58.4 | -0.032 | 0.002 |
| 14 | Lidocaine 5% | 57.3 | 19.5 | 40.7 | 41.6 | -0.008 | 0.484 |
| 15 | Epinephrine (injectable) | 78.0 | 67.4 | 70.7 | 67.3 | -0.003 | 0.763 |
| 16 | Halothane (inhalation) | 79.3 | 72.0 | 69.1 | 55.8 | -0.029 | 0.006 |
| 17 | Atropine (injectable) | 87.8 | 80.5 | 75.5 | 72.6 | -0.016 | 0.065 |
| 18 | Thiopental (powder) | 73.2 | 40.7 | 43.8 | 38.1 | -0.043 | 0.001 |
| 19 | Suxamethonium bromide (powder) | 31.7 | 14.2 | 26.6 | 2.7 | -0.034 | 0.001 |
| 20 | Ketamine (injectable) | 86.6 | 76.0 | 72.3 | 66.4 | -0.021 | 0.019 |
